# Supplementary material for: Formation of the quasi-planar B56 boron cluster: topological path from B12 and disk aromaticity
Source: Royal Society of Chemistry journal article supplement (doi:10.1039/d2cp02571j), 2022-01-01
Supplement: d2cp02571j1.pdf [file d2cp02571j1.pdf]

**Electronic Supplementary Information (ESI)**  
**Formation of the quasi-planar B<sub>56</sub> boron cluster: topological path  
from B<sub>12</sub> and disk aromaticity**

**Fernando Buendía,<sup>a</sup> Hung Tan Pham,<sup>b</sup> José Enrique Barquera-Lozada,<sup>c</sup>**

**Marcela Beltrán Sanchez<sup>d</sup> and Minh Tho Nguyen<sup>b,e,\*</sup>**

<sup>a</sup> Instituto de Física, Universidad Nacional Autónoma de México, C.P. 04510 Cd. de México, México

<sup>b</sup> Department of Chemistry, KU Leuven, Celestijnenlaan 200F, B-3001 Leuven, Belgium.

<sup>c</sup> Instituto de Química, Universidad Nacional Autónoma de México, Ciudad de México, 04510 México

<sup>d</sup> Instituto de Investigaciones en Materiales, Universidad Nacional Autónoma de México,  
C.P. 04510 Cd. de México, México

<sup>e</sup> Institute for Computational Science and Technology (ICST), Ho Chi Minh City, Vietnam.

\* Email: minh.nguyen@kuleuven.be

**Table 1.** Cartesian coordinates of the most stable isomers A-J of B<sub>56</sub> optimized at the TPSSh/6-311+G(d) level.

|                      |           |                     |                                                                                     |
|----------------------|-----------|---------------------|-------------------------------------------------------------------------------------|
| B56                  |           |                     | 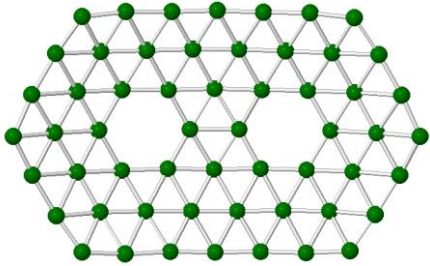 |
| #Energy = 0.0 eV (A) |           |                     |                                                                                     |
| B                    | 0.900106  | 0.002507 -0.866462  |                                                                                     |
| B                    | -0.870274 | -0.001793 -0.886862 |                                                                                     |
| B                    | 0.017286  | -1.453923 -0.862002 |                                                                                     |
| B                    | 0.010846  | 1.455407 -0.889522  |                                                                                     |
| B                    | 1.699516  | -1.433253 -0.751842 |                                                                                     |
| B                    | 1.694466  | 1.442507 -0.776962  |                                                                                     |
| B                    | -1.667774 | -1.440903 -0.797562 |                                                                                     |
| B                    | -1.674744 | 1.434007 -0.818852  |                                                                                     |
| B                    | 0.849176  | -2.912253 -0.436162 |                                                                                     |
| B                    | -0.819884 | -2.917053 -0.459802 |                                                                                     |
| B                    | 0.836756  | 2.921297 -0.477042  |                                                                                     |
| B                    | -0.834904 | 2.916777 -0.496402  |                                                                                     |
| B                    | 3.354036  | -1.443973 -0.525692 |                                                                                     |
| B                    | 3.348436  | 1.454797 -0.542002  |                                                                                     |
| B                    | -3.327884 | -1.458263 -0.621652 |                                                                                     |
| B                    | -3.334644 | 1.440087 -0.639102  |                                                                                     |
| B                    | 2.498056  | -2.886303 -0.265312 |                                                                                     |
| B                    | 2.488246  | 2.899717 -0.298382  |                                                                                     |
| B                    | -2.472954 | -2.892473 -0.322222 |                                                                                     |
| B                    | -2.487914 | 2.884887 -0.358012  |                                                                                     |
| B                    | 4.180156  | 0.006477 -0.422542  |                                                                                     |
| B                    | -4.162074 | -0.012273 -0.544932 |                                                                                     |
| B                    | 0.010026  | -4.337213 0.073518  |                                                                                     |
| B                    | -0.009554 | 4.345197 0.025308   |                                                                                     |
| B                    | 1.637026  | -4.296053 0.153848  |                                                                                     |
| B                    | -1.618544 | -4.298983 0.117408  |                                                                                     |
| B                    | 1.619236  | 4.309227 0.109358   |                                                                                     |
| B                    | -1.639294 | 4.299987 0.070208   |                                                                                     |
| B                    | 4.133986  | -2.858763 0.073068  |                                                                                     |
| B                    | 4.120626  | 2.874397 0.055598   |                                                                                     |
| B                    | -4.120064 | -2.874293 -0.043642 |                                                                                     |
| B                    | -4.132864 | 2.855557 -0.064292  |                                                                                     |
| B                    | 4.960116  | -1.430503 -0.004592 |                                                                                     |
| B                    | 4.948656  | 1.445607 0.000218   |                                                                                     |
| B                    | -4.951754 | -1.452433 -0.158852 |                                                                                     |
| B                    | -4.952734 | 1.424057 -0.154802  |                                                                                     |
| B                    | 3.262086  | -4.305223 0.459238  |                                                                                     |
| B                    | 3.241296  | 4.321717 0.429798   |                                                                                     |
| B                    | -3.252584 | -4.313253 0.379468  |                                                                                     |
| B                    | -3.270754 | 4.303687 0.342098   |                                                                                     |
| B                    | 5.754696  | 0.009577 0.255548   |                                                                                     |
| B                    | -5.761324 | -0.014223 0.071668  |                                                                                     |
| B                    | 4.793286  | -4.155403 0.861468  |                                                                                     |
| B                    | 4.770786  | 4.173807 0.846458   |                                                                                     |
| B                    | -4.798224 | -4.169763 0.728208  |                                                                                     |

|   |           |           |          |
|---|-----------|-----------|----------|
| B | -4.813514 | 4.150277  | 0.705248 |
| B | 5.697826  | -2.859743 | 0.757328 |
| B | 5.678146  | 2.880077  | 0.756818 |
| B | -5.708754 | -2.881193 | 0.582008 |
| B | -5.715974 | 2.855047  | 0.577908 |
| B | 6.512646  | 1.435077  | 0.864458 |
| B | 6.522546  | -1.410583 | 0.861068 |
| B | -6.547994 | -1.438143 | 0.644978 |
| B | -6.549744 | 1.408397  | 0.647778 |
| B | 7.151916  | 0.013407  | 1.140508 |
| B | -7.195284 | -0.015343 | 0.894928 |

B56

#Energy=+1.12 eV (B)

|   |           |           |           |
|---|-----------|-----------|-----------|
| B | -4.167294 | -0.002512 | -0.497311 |
| B | -1.683104 | -1.446774 | -0.846668 |
| B | -3.341419 | -1.447742 | -0.601263 |
| B | -4.949369 | -1.439219 | -0.114820 |
| B | -0.873674 | 0.019869  | -0.888668 |
| B | -5.758820 | -0.008129 | 0.141960  |
| B | -0.015589 | -1.466146 | -0.894613 |
| B | -0.824434 | -2.901468 | -0.475679 |
| B | -2.469641 | -2.879177 | -0.296324 |
| B | -4.118980 | -2.855970 | 0.018740  |
| B | 2.460768  | 0.062865  | -0.646097 |
| B | 0.820295  | 2.922853  | -0.530174 |
| B | 2.480722  | 2.915161  | -0.397903 |
| B | 4.085262  | 2.816709  | 0.131140  |
| B | -0.834320 | 2.921274  | -0.441582 |
| B | -2.482014 | 2.885236  | -0.280268 |
| B | -4.126347 | 2.859923  | 0.025788  |
| B | 0.005609  | 1.479768  | -0.914640 |
| B | 3.342111  | 1.456178  | -0.570406 |
| B | 4.986642  | 1.447656  | -0.087566 |
| B | -1.681967 | 1.444275  | -0.756100 |
| B | -3.334908 | 1.453091  | -0.578571 |
| B | -4.954975 | 1.438025  | -0.106184 |
| B | 0.853368  | 0.038412  | -0.918390 |
| B | 4.212905  | 0.011471  | -0.549685 |
| B | 5.716553  | -0.024609 | 0.279035  |
| B | 1.670995  | -1.420521 | -0.793604 |
| B | 3.365518  | -1.477680 | -0.670813 |
| B | 5.012802  | -1.472939 | -0.216599 |
| B | 0.828616  | -2.884323 | -0.355640 |
| B | 2.494530  | -2.930490 | -0.369934 |
| B | 4.066790  | -2.781097 | 0.205502  |
| B | -7.184338 | -0.010891 | 0.982236  |
| B | 7.204255  | -0.020895 | 0.980128  |
| B | 6.533973  | 1.411701  | 0.752571  |
| B | -6.537750 | 1.412921  | 0.730515  |
| B | 6.561903  | -1.442070 | 0.725064  |

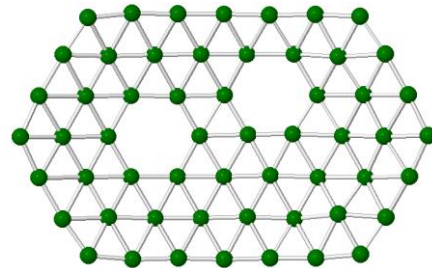

|   |           |           |          |
|---|-----------|-----------|----------|
| B | -6.544107 | -1.431499 | 0.726183 |
| B | 5.719722  | 2.853735  | 0.648810 |
| B | -5.707247 | 2.858913  | 0.661193 |
| B | 5.716858  | -2.869856 | 0.627396 |
| B | -5.699284 | -2.870262 | 0.667785 |
| B | 1.619637  | 4.254411  | 0.163486 |
| B | 3.249421  | 4.261033  | 0.398726 |
| B | -0.004179 | 4.305820  | 0.080588 |
| B | -1.643854 | 4.305318  | 0.151295 |
| B | -3.271101 | 4.324779  | 0.440994 |
| B | -4.809668 | 4.157490  | 0.800090 |
| B | 4.808869  | 4.148748  | 0.771757 |
| B | 1.623048  | -4.303659 | 0.141193 |
| B | 3.248836  | -4.288158 | 0.435548 |
| B | -0.000589 | -4.349400 | 0.091199 |
| B | -1.615208 | -4.289316 | 0.166125 |
| B | -3.242128 | -4.292273 | 0.436952 |
| B | -4.786360 | -4.152031 | 0.800966 |
| B | 4.801741  | -4.155035 | 0.767079 |

B56

#Energy = +1.13 eV (C)

|   |           |           |           |
|---|-----------|-----------|-----------|
| B | -2.895244 | -1.448472 | -0.733631 |
| B | -1.165154 | 0.147468  | -3.110251 |
| B | -0.272944 | 0.694098  | 3.449819  |
| B | -2.736134 | -1.790062 | 0.946109  |
| B | 1.098556  | 1.551938  | 3.047419  |
| B | 0.316666  | 1.016138  | -3.233471 |
| B | 1.162516  | -0.148412 | 3.106989  |
| B | -0.319734 | -1.015362 | 3.231989  |
| B | -2.025264 | -2.813012 | -0.235441 |
| B | -3.489064 | -0.338172 | 0.405879  |
| B | 0.271706  | -0.691742 | -3.448081 |
| B | -1.131304 | 1.803368  | -2.750111 |
| B | 2.906326  | 1.448878  | 0.734719  |
| B | 1.124916  | -1.800872 | 2.738319  |
| B | -1.567994 | -2.939322 | 1.392499  |
| B | -1.990734 | -2.377682 | -1.841061 |
| B | -1.098204 | -1.553952 | -3.051181 |
| B | 2.738516  | 1.790498  | -0.944491 |
| B | -2.934394 | -0.467332 | 2.006929  |
| B | -0.376854 | -2.555732 | 2.518829  |
| B | -2.512184 | 0.931908  | -2.420341 |
| B | -3.389064 | 0.113138  | -1.196011 |
| B | 1.747336  | 0.092358  | -3.131881 |
| B | -0.306064 | 2.363488  | 3.575979  |
| B | 0.369046  | 2.553548  | -2.508821 |
| B | 3.492056  | 0.336848  | -0.408171 |
| B | 2.032076  | 2.814178  | 0.239589  |
| B | 2.936696  | 0.470178  | -2.008511 |
| B | 2.508316  | -0.934512 | 2.414569  |

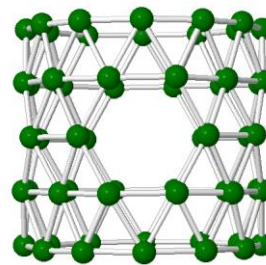

|   |           |           |           |
|---|-----------|-----------|-----------|
| B | 1.560806  | 2.935508  | -1.382751 |
| B | 3.394126  | -0.116102 | 1.193709  |
| B | 2.000476  | 2.375948  | 1.844809  |
| B | -1.747994 | -0.084892 | 3.128859  |
| B | -3.052434 | 0.948518  | 2.903539  |
| B | -1.013664 | -4.114232 | 0.229199  |
| B | -0.758294 | -3.195002 | -2.704391 |
| B | -3.857924 | 0.917488  | 1.508679  |
| B | 1.720326  | -1.598572 | -3.535571 |
| B | 1.103076  | -3.434472 | 2.229079  |
| B | -3.591124 | 1.797328  | -1.413341 |
| B | -1.294704 | -3.850282 | -1.331001 |
| B | 0.309156  | -2.360512 | -3.580861 |
| B | -1.111144 | 3.432068  | -2.223461 |
| B | -4.149254 | 1.129458  | -0.054931 |
| B | -1.720084 | 1.605958  | 3.525949  |
| B | -2.503454 | 2.631918  | -2.261721 |
| B | -0.299374 | -4.001002 | 1.669129  |
| B | 3.859186  | -0.916602 | -1.513291 |
| B | 2.494436  | -2.634112 | 2.253619  |
| B | 3.586606  | -1.801162 | 1.406169  |
| B | 3.049206  | -0.943822 | -2.906351 |
| B | 1.014506  | 4.113098  | -0.218511 |
| B | 0.768506  | 3.194668  | 2.708149  |
| B | 0.286036  | 3.995838  | -1.650751 |
| B | 4.148936  | -1.132752 | 0.049849  |
| B | 1.309686  | 3.852308  | 1.338039  |

B56

#Energy = +1.17 eV (D)

|   |           |           |           |
|---|-----------|-----------|-----------|
| B | -1.253779 | 3.010616  | 0.348390  |
| B | 1.948451  | 2.592996  | 0.083850  |
| B | -2.624599 | 1.977886  | 0.357620  |
| B | 2.890301  | 1.197476  | -0.102820 |
| B | -0.564169 | 3.374296  | -1.163980 |
| B | -3.151449 | -1.305864 | 0.110000  |
| B | -1.873219 | 2.402876  | 1.842490  |
| B | -3.372329 | -0.315504 | -1.217580 |
| B | 2.620331  | 1.835096  | 1.486130  |
| B | -2.096509 | 2.670996  | -1.121800 |
| B | 3.215781  | -0.457924 | -0.267350 |
| B | -3.162689 | 1.388166  | -1.146000 |
| B | -2.944749 | 1.125016  | 1.797790  |
| B | -0.462969 | -3.253914 | -0.248480 |
| B | -0.349879 | 3.118516  | 1.787400  |
| B | 3.058181  | 0.517576  | -1.687730 |
| B | 1.108431  | 3.136996  | -1.294460 |
| B | 1.323441  | 2.890156  | 1.638310  |
| B | -3.164509 | -0.565334 | 1.606050  |
| B | -2.522279 | -2.126214 | 1.423640  |
| B | 2.399711  | 2.087686  | -1.506310 |

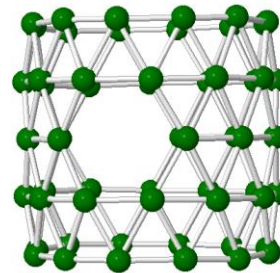

|   |           |           |           |
|---|-----------|-----------|-----------|
| B | 1.231241  | -3.018364 | -0.346800 |
| B | 2.068221  | -2.750524 | 1.112440  |
| B | -2.723359 | -1.876754 | -1.399060 |
| B | 3.273261  | 0.261756  | 1.305290  |
| B | 0.274461  | -3.067654 | -1.784240 |
| B | 2.887281  | -1.149004 | -1.786800 |
| B | 3.093791  | -1.401014 | 1.145220  |
| B | 1.861031  | -2.498574 | -1.838990 |
| B | -1.379729 | -2.917824 | -1.644370 |
| B | -1.170239 | -3.177484 | 1.298030  |
| B | 0.486291  | -3.327434 | 1.179590  |
| B | -1.405939 | 3.113026  | -2.628670 |
| B | -3.335049 | 0.642776  | -2.666080 |
| B | -2.274389 | 1.590766  | 3.280870  |
| B | 0.587741  | 2.880906  | 3.183880  |
| B | 1.630991  | 2.696796  | -2.865100 |
| B | -2.707879 | 2.113306  | -2.607350 |
| B | 0.162631  | 3.386996  | -2.699250 |
| B | -0.974839 | 2.591266  | 3.290920  |
| B | 2.059131  | 2.198496  | 3.022080  |
| B | -2.741059 | -1.473804 | 2.968650  |
| B | 3.001321  | 0.899146  | 2.896520  |
| B | 2.825531  | -0.175894 | -3.194970 |
| B | 2.570691  | 1.409996  | -3.096400 |
| B | -3.148169 | -0.967724 | -2.761310 |
| B | -2.911449 | 0.127976  | 3.177370  |
| B | -2.143899 | -2.223224 | -2.996820 |
| B | 0.957611  | -2.603944 | -3.288250 |
| B | 2.683891  | -2.208294 | 2.597760  |
| B | -1.731909 | -2.739874 | 2.843290  |
| B | -0.251319 | -3.326994 | 2.711960  |
| B | -0.666939 | -2.808474 | -3.176350 |
| B | 2.274771  | -1.708224 | -3.282440 |
| B | 3.240951  | -0.679284 | 2.691350  |
| B | 1.373821  | -3.114434 | 2.632880  |

B56

#Energy=+1.38 eV (E)

|   |           |           |           |
|---|-----------|-----------|-----------|
| B | -2.544516 | -0.075998 | -0.670008 |
| B | -4.208975 | 0.002775  | -0.520596 |
| B | -1.676899 | -1.474745 | -0.803219 |
| B | -4.974340 | -1.447659 | -0.127373 |
| B | -0.877928 | -0.021227 | -0.919214 |
| B | -5.695019 | 0.003553  | 0.287798  |
| B | 0.026958  | -1.488573 | -0.891390 |
| B | -0.860325 | -2.944872 | -0.427885 |
| B | -2.501966 | -2.933823 | -0.366573 |
| B | -4.131935 | -2.868961 | -0.014402 |
| B | 0.830897  | 2.901012  | -0.476240 |
| B | 2.488359  | 2.866637  | -0.292437 |
| B | 4.133851  | 2.859984  | -0.004005 |

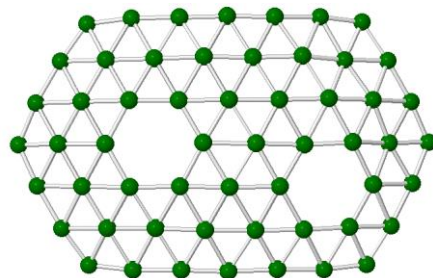

|                        |           |           |           |
|------------------------|-----------|-----------|-----------|
| B                      | -0.848125 | 2.889542  | -0.403227 |
| B                      | -2.500463 | 2.917122  | -0.368916 |
| B                      | -4.101490 | 2.860548  | 0.129633  |
| B                      | 0.019438  | 1.446448  | -0.908514 |
| B                      | 1.692105  | 1.434244  | -0.787806 |
| B                      | 3.360862  | 1.455508  | -0.602949 |
| B                      | 4.964144  | 1.443030  | -0.087885 |
| B                      | -1.689554 | 1.447978  | -0.818539 |
| B                      | -3.383307 | 1.465722  | -0.597109 |
| B                      | -5.018238 | 1.473248  | -0.118681 |
| B                      | 0.884956  | 0.001025  | -0.872097 |
| B                      | 4.174157  | 0.002328  | -0.497688 |
| B                      | 5.777516  | 0.011504  | 0.137199  |
| B                      | 1.683270  | -1.448975 | -0.792976 |
| B                      | 3.348815  | -1.452814 | -0.592985 |
| B                      | 4.975993  | -1.431896 | -0.101448 |
| B                      | 0.832439  | -2.931959 | -0.468264 |
| B                      | 2.497828  | -2.868694 | -0.271765 |
| B                      | 4.129869  | -2.847992 | -0.003014 |
| B                      | -7.203270 | 0.027829  | 0.961181  |
| B                      | 7.195984  | 0.017738  | 0.985473  |
| B                      | 6.557650  | 1.434400  | 0.730035  |
| B                      | -6.559246 | 1.453333  | 0.714880  |
| B                      | 6.547353  | -1.411222 | 0.725239  |
| B                      | -6.519979 | -1.392008 | 0.716253  |
| B                      | 5.713738  | 2.867025  | 0.678157  |
| B                      | -5.722137 | 2.873049  | 0.663000  |
| B                      | 5.721466  | -2.847813 | 0.654228  |
| B                      | -5.682148 | -2.837053 | 0.652481  |
| B                      | 1.623170  | 4.273571  | 0.151195  |
| B                      | 3.251559  | 4.281680  | 0.435431  |
| B                      | 0.002410  | 4.308574  | 0.086009  |
| B                      | -1.634350 | 4.285719  | 0.132477  |
| B                      | -3.267057 | 4.323829  | 0.433265  |
| B                      | -4.802536 | 4.186774  | 0.794494  |
| B                      | 4.789145  | 4.143952  | 0.812710  |
| B                      | 1.632312  | -4.292875 | 0.155748  |
| B                      | 3.269811  | -4.285906 | 0.432805  |
| B                      | 0.017244  | -4.341988 | 0.104090  |
| B                      | -1.636848 | -4.289387 | 0.140386  |
| B                      | -3.270660 | -4.288675 | 0.427923  |
| B                      | -4.802788 | -4.141451 | 0.810952  |
| B                      | 4.809794  | -4.133533 | 0.801210  |
| B56                    |           |           |           |
| #Energy = +2.07 eV (F) |           |           |           |
| B                      | -3.012911 | -0.851774 | 0.601768  |
| B                      | -2.048261 | -2.220484 | 0.991888  |
| B                      | -2.508421 | 2.220186  | -0.649732 |
| B                      | -1.076921 | 3.049656  | -1.133222 |
| B                      | -1.937531 | 2.079326  | -2.257302 |

|   |           |           |           |
|---|-----------|-----------|-----------|
| B | -2.800571 | -2.128364 | -0.552282 |
| B | 2.969909  | 0.863706  | -0.479662 |
| B | 1.981229  | -2.624754 | 0.828288  |
| B | -1.587441 | 3.138186  | 0.467208  |
| B | -2.752951 | 2.036466  | 1.007918  |
| B | -2.219511 | -0.950374 | 2.099268  |
| B | 2.075859  | 2.218246  | -1.020772 |
| B | -3.060471 | 0.953816  | -1.666962 |
| B | 1.408989  | -3.503814 | -0.419372 |
| B | -2.935501 | 0.499066  | 1.623578  |
| B | -0.092721 | 3.763596  | 0.070658  |
| B | -3.383751 | -0.597094 | -1.042262 |
| B | -1.725591 | -3.357074 | -0.232792 |
| B | -0.207711 | -4.157014 | -0.170172 |
| B | -0.356691 | 2.560626  | -2.573982 |
| B | -1.037141 | -2.086044 | 2.363288  |
| B | 2.399789  | 0.948706  | -2.090832 |
| B | 0.752199  | -3.707384 | 1.090148  |
| B | 0.733849  | -2.592304 | 2.325518  |
| B | 1.595909  | 3.387836  | 0.099958  |
| B | 1.273589  | 2.128486  | -2.511112 |
| B | 2.523549  | -1.885724 | 2.218428  |
| B | 3.500439  | 0.878546  | 1.149788  |
| B | 2.278419  | -2.086484 | -0.846912 |
| B | 2.772849  | 2.269856  | 0.528438  |
| B | 2.742009  | -0.580934 | -1.413792 |
| B | 3.406349  | -0.538714 | 1.899768  |
| B | -3.318721 | -0.357564 | -2.708542 |
| B | -2.430171 | -3.212044 | -1.788332 |
| B | -1.259141 | 1.722856  | -3.762702 |
| B | -1.969931 | 3.103376  | 2.143498  |
| B | -2.586891 | 0.938326  | -3.327222 |
| B | -3.213631 | -1.868274 | -2.186672 |
| B | 0.537469  | -4.150404 | -1.734832 |
| B | -2.341091 | 0.343006  | 3.252858  |
| B | -0.752341 | 4.009696  | 1.632088  |
| B | -2.752441 | 1.788386  | 2.669808  |
| B | -1.415641 | -0.934224 | 3.573318  |
| B | -1.081041 | -4.085124 | -1.598342 |
| B | 0.849679  | 4.068216  | 1.474448  |
| B | 1.758149  | 0.959846  | -3.649352 |
| B | -0.034021 | -1.761604 | 3.624878  |
| B | 1.781279  | -3.218384 | -2.085942 |
| B | 0.353729  | 1.736986  | -3.876502 |
| B | 2.571269  | -1.872424 | -2.483432 |
| B | 1.581269  | -1.726114 | 3.590398  |
| B | 2.391139  | -0.415114 | -3.129622 |
| B | 3.174679  | 2.243706  | 2.228408  |
| B | 2.789109  | -0.710594 | 3.373728  |
| B | 3.367249  | 0.802326  | 2.843288  |

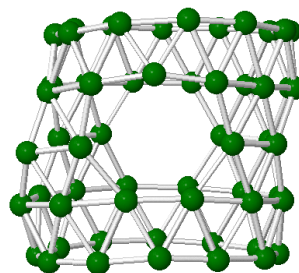



|                        |           |           |           |  |
|------------------------|-----------|-----------|-----------|--|
| B                      | 2.329229  | 3.467186  | 1.620018  |  |
| B56                    |           |           |           |  |
| #Energy = +2.32 eV (G) |           |           |           |  |
| B                      | -0.041374 | 2.728859  | 1.415629  |  |
| B                      | 2.344976  | -2.665821 | -1.078171 |  |
| B                      | 3.164546  | -1.219561 | -1.322771 |  |
| B                      | -0.365654 | 1.570469  | 2.531489  |  |
| B                      | -0.821194 | 3.136719  | -1.293511 |  |
| B                      | -2.770074 | -1.884221 | 0.624039  |  |
| B                      | 2.820456  | 2.360449  | 0.771989  |  |
| B                      | -3.361164 | -0.506851 | -0.230841 |  |
| B                      | -1.611944 | 2.188749  | 1.575699  |  |
| B                      | 1.687126  | -1.511711 | -2.145151 |  |
| B                      | 3.489816  | 1.426079  | -0.428531 |  |
| B                      | -0.157454 | 0.957059  | -3.053841 |  |
| B                      | -1.294244 | 1.976549  | -2.372191 |  |
| B                      | -2.384734 | 2.499359  | -1.165771 |  |
| B                      | 0.641876  | 0.217689  | 2.913279  |  |
| B                      | 0.564416  | -4.072301 | 0.763389  |  |
| B                      | 3.117606  | 0.818979  | 1.202849  |  |
| B                      | -0.076144 | 3.658009  | 0.086139  |  |
| B                      | 2.066456  | -0.203491 | 2.153299  |  |
| B                      | -2.714924 | -0.217471 | -1.697221 |  |
| B                      | 2.526096  | -0.137211 | -2.508471 |  |
| B                      | -1.793464 | -2.667941 | 1.914689  |  |
| B                      | 0.951606  | -0.297531 | -3.027281 |  |
| B                      | -3.506834 | 1.131259  | -0.907631 |  |
| B                      | -1.536874 | -1.312521 | -2.295281 |  |
| B                      | 0.258166  | 2.514749  | -2.576411 |  |
| B                      | 1.361786  | 3.077369  | 0.552479  |  |
| B                      | -4.019324 | 0.840779  | 0.634809  |  |
| B                      | -0.338564 | -2.462511 | 2.938479  |  |
| B                      | 2.407546  | 2.615649  | -0.810621 |  |
| B                      | -1.639544 | -1.311461 | 3.023859  |  |
| B                      | -3.766894 | -0.599471 | 1.377939  |  |
| B                      | 1.913776  | -3.021481 | 0.570989  |  |
| B                      | 3.901246  | 0.318989  | -1.621221 |  |
| B                      | -1.818314 | 0.357719  | -3.087781 |  |
| B                      | 3.394066  | -0.805481 | 1.324019  |  |
| B                      | -1.062154 | 0.244769  | 3.561619  |  |
| B                      | 1.034596  | -2.964921 | 1.956529  |  |
| B                      | 1.153526  | -3.860161 | -0.715351 |  |
| B                      | 0.951936  | 3.415959  | -1.178321 |  |
| B                      | 2.937646  | 1.552899  | -2.140561 |  |
| B                      | -3.056144 | -1.692811 | 2.274249  |  |
| B                      | 0.088066  | -1.841221 | -2.779551 |  |
| B                      | -0.530504 | -3.732491 | 1.908779  |  |
| B                      | 1.149996  | -1.425851 | 2.889909  |  |
| B                      | -2.467394 | -1.710551 | -1.011981 |  |
| B                      | -2.016634 | 1.389179  | 3.001269  |  |

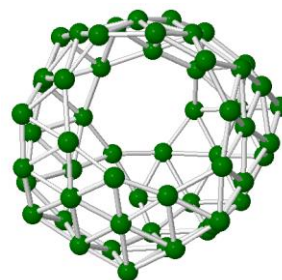

|   |           |           |           |
|---|-----------|-----------|-----------|
| B | 0.956726  | -3.022471 | -2.049021 |
| B | -2.940184 | 1.381349  | -2.398311 |
| B | 3.865626  | -0.210591 | -0.062421 |
| B | 1.896116  | 2.797209  | -2.369651 |
| B | -0.639224 | -0.621461 | -3.602041 |
| B | -0.168604 | -1.068451 | 3.842179  |
| B | 2.341766  | -1.938791 | 1.815909  |
| B | -3.165884 | 1.603619  | 1.894679  |
| B | -2.922124 | 2.206359  | 0.409709  |

B56  
#Energy = +2.36 eV (H)

|   |           |           |           |
|---|-----------|-----------|-----------|
| B | 0.423822  | 2.691128  | -1.757906 |
| B | -0.901358 | 3.078197  | -0.837736 |
| B | 1.936882  | -1.049162 | -2.531866 |
| B | -1.894008 | -1.423513 | 2.038574  |
| B | -2.264608 | 0.239607  | 2.339334  |
| B | -1.493448 | -2.734933 | 0.838254  |
| B | -0.877498 | -0.499353 | 2.981094  |
| B | 1.978722  | 2.518788  | 0.486334  |
| B | 2.563622  | 0.304417  | -1.659796 |
| B | 2.813052  | 1.627707  | -0.642936 |
| B | 0.017742  | -3.238853 | 0.316754  |
| B | 0.724442  | 2.969988  | 1.506964  |
| B | -2.369128 | 2.261268  | -0.974586 |
| B | 0.424022  | -0.275472 | -3.208846 |
| B | -2.519768 | 0.904687  | -1.968336 |
| B | 1.821052  | 0.567018  | -3.173436 |
| B | 0.528802  | -2.016522 | -2.672056 |
| B | 0.406282  | 2.013518  | 2.803224  |
| B | 0.764562  | 3.562117  | -0.247446 |
| B | -2.347188 | -0.675532 | -2.512886 |
| B | 0.767392  | -0.781632 | 3.163354  |
| B | -0.916848 | 2.800617  | 1.994504  |
| B | -1.254408 | -3.216003 | -0.837376 |
| B | 2.014692  | 2.137818  | 2.124454  |
| B | -2.344538 | 1.902638  | 1.864334  |
| B | 2.060552  | 3.117698  | -1.121736 |
| B | 1.517252  | -2.800782 | 1.160454  |
| B | 3.583162  | 0.190618  | -0.353476 |
| B | -1.872988 | 2.967718  | 0.537014  |
| B | 0.082572  | 0.622378  | 3.625324  |
| B | -3.492178 | -1.819122 | -1.670686 |
| B | 0.300972  | -3.235333 | -1.419496 |
| B | 1.942522  | 1.854938  | -2.182456 |
| B | 2.453832  | -0.569133 | 2.572994  |
| B | 2.952502  | -1.235523 | -1.149556 |
| B | 1.679862  | 0.784698  | 3.248634  |
| B | -3.052548 | -2.188382 | 1.076944  |
| B | 0.309752  | 1.367458  | -2.730436 |
| B | -3.402678 | -0.759462 | 1.681134  |

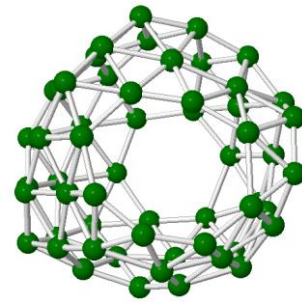

|   |           |           |           |
|---|-----------|-----------|-----------|
| B | -1.058918 | 0.429697  | -2.703596 |
| B | -0.545578 | 3.877838  | 0.715064  |
| B | 1.667392  | -2.028993 | 2.568444  |
| B | -2.488888 | -2.995613 | -2.001016 |
| B | 1.528752  | -3.379263 | -0.373746 |
| B | 2.933822  | -1.763302 | 1.529264  |
| B | -3.564288 | 1.058528  | -0.628096 |
| B | -3.479648 | 0.807818  | 1.281234  |
| B | -0.911168 | -1.216563 | -3.203936 |
| B | -3.339888 | 2.226207  | 0.484944  |
| B | 3.673862  | -0.129272 | 1.372314  |
| B | 2.831422  | -2.521992 | -0.025816 |
| B | -2.771488 | -2.848533 | -0.362086 |
| B | -3.717768 | -0.234633 | -1.623516 |
| B | -0.901998 | -2.835163 | -2.541666 |
| B | 3.130662  | 0.930907  | 2.526414  |
| B | 3.948822  | -1.343972 | 0.279164  |

B56  
#Energy = +2.39 eV (I)

|   |           |           |           |
|---|-----------|-----------|-----------|
| B | -0.644490 | 2.672360  | 1.078376  |
| B | 0.744650  | 2.989140  | 0.230606  |
| B | -2.081450 | 2.170330  | 0.329176  |
| B | 0.911790  | 2.694960  | 1.856586  |
| B | -2.076250 | 1.979360  | -1.353554 |
| B | -0.466220 | 2.099730  | 2.786506  |
| B | 0.691740  | 2.892290  | -1.515284 |
| B | -1.925800 | 2.161450  | 1.991886  |
| B | -0.524840 | -1.898420 | 2.634286  |
| B | -0.065920 | 0.639540  | 3.549806  |
| B | 0.907810  | -2.460960 | 1.805016  |
| B | 2.174030  | 2.718250  | -0.688444 |
| B | 2.232480  | 2.793130  | 0.945876  |
| B | -0.769160 | 2.465810  | -2.330004 |
| B | -3.259490 | 0.982950  | -0.225504 |
| B | 2.202750  | -2.258830 | 0.712846  |
| B | -1.675560 | 1.068050  | -2.669534 |
| B | 3.128760  | -0.897580 | 0.972676  |
| B | 3.353430  | 0.219620  | -0.316154 |
| B | 2.800880  | -1.343430 | -0.655884 |
| B | -3.095180 | 1.300180  | 1.379286  |
| B | 0.686790  | -3.067890 | 0.225596  |
| B | -0.547180 | -2.992020 | 1.326106  |
| B | -1.975670 | -2.372530 | 1.670736  |
| B | 1.017790  | 1.917790  | 3.370176  |
| B | 2.813830  | -0.131090 | -1.873014 |
| B | 1.755670  | 0.518220  | 3.582406  |
| B | -3.605810 | -0.222150 | 0.956696  |
| B | 1.818440  | -2.634860 | -0.956974 |
| B | 2.407810  | -1.801850 | 2.270806  |
| B | -3.054100 | 0.595520  | -1.886284 |

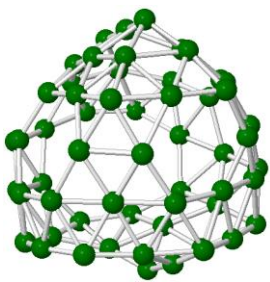

|   |           |           |           |
|---|-----------|-----------|-----------|
| B | -0.880410 | -0.780420 | 3.862016  |
| B | 3.600080  | 0.660910  | 1.306916  |
| B | 3.453810  | 1.907940  | 0.209276  |
| B | 3.040020  | -0.120550 | 2.601166  |
| B | 0.794840  | 2.148690  | -3.068044 |
| B | 3.206360  | 1.527890  | -1.454414 |
| B | 1.699980  | -0.602910 | -3.008214 |
| B | 1.009660  | -2.076480 | -2.410174 |
| B | -2.128260 | -1.372510 | 3.079106  |
| B | 0.706850  | -0.884340 | 3.949826  |
| B | 0.320580  | -3.129990 | -1.361244 |
| B | -3.611610 | -0.581690 | -0.677864 |
| B | 2.138360  | 2.510790  | -2.288404 |
| B | 0.599380  | 0.405620  | -3.701134 |
| B | 0.154040  | -1.181820 | -3.445824 |
| B | -3.343560 | -2.025240 | 0.541216  |
| B | -0.615830 | -2.466270 | -2.555844 |
| B | -3.338160 | -1.503150 | 2.051106  |
| B | -2.195460 | -2.135610 | -2.271194 |
| B | -0.535740 | 1.614640  | -3.814204 |
| B | -2.390790 | -0.443000 | -3.211884 |
| B | 2.313040  | -1.014260 | 3.751346  |
| B | -1.061310 | 0.057290  | -3.977104 |
| B | -3.328290 | -2.228250 | -1.070684 |
| B | -3.489100 | -1.084370 | -2.240564 |

B56  
#Energy= +2.56 eV (J)

|   |           |           |          |
|---|-----------|-----------|----------|
| B | 1.658964  | 0.002882  | 0.049238 |
| B | 3.329031  | 0.005295  | 0.117614 |
| B | 6.686984  | -0.010687 | 0.405937 |
| B | 8.246840  | -0.009310 | 0.984399 |
| B | 9.450174  | 0.005919  | 2.155352 |
| B | -1.662905 | 0.004476  | 0.027735 |
| B | -3.330017 | 0.004311  | 0.105817 |
| B | -6.546492 | -0.013430 | 0.669253 |
| B | -8.118183 | -0.004385 | 1.250607 |
| B | -9.582861 | 0.008635  | 1.988666 |
| B | 0.828437  | 1.463029  | 0.208346 |
| B | 2.477984  | 1.445739  | 0.396400 |
| B | 4.128707  | 1.475451  | 0.241946 |
| B | 5.773308  | 1.450564  | 0.447821 |
| B | 7.264668  | 1.372095  | 1.200031 |
| B | 8.888566  | 1.461209  | 1.841260 |
| B | -0.820038 | 1.458514  | 0.236849 |
| B | -2.473360 | 1.449472  | 0.385120 |
| B | -4.124516 | 1.481596  | 0.310477 |
| B | -5.722015 | 1.439839  | 0.732670 |
| B | -7.406063 | 1.445313  | 0.702872 |
| B | -8.972818 | 1.456823  | 1.682716 |
| B | 0.827051  | -1.463053 | 0.135302 |

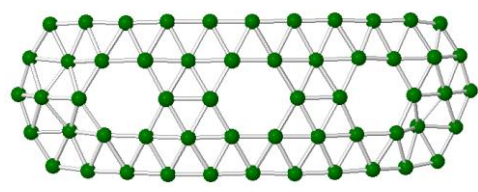

|                        |           |           |           |  |
|------------------------|-----------|-----------|-----------|--|
| B                      | 2.486748  | -1.490705 | 0.108231  |  |
| B                      | 4.111850  | -1.457886 | 0.402630  |  |
| B                      | 5.760291  | -1.448265 | 0.521297  |  |
| B                      | 7.231910  | -1.358986 | 1.303410  |  |
| B                      | 8.879209  | -1.451704 | 1.876004  |  |
| B                      | -0.827364 | -1.473076 | 0.072089  |  |
| B                      | -2.494652 | -1.482492 | 0.092061  |  |
| B                      | -4.110945 | -1.468607 | 0.383056  |  |
| B                      | -5.774403 | -1.474558 | 0.512655  |  |
| B                      | -7.118452 | -1.345266 | 1.536430  |  |
| B                      | -8.900690 | -1.437923 | 1.856134  |  |
| B                      | 0.006972  | 2.918299  | 0.431299  |  |
| B                      | 1.644844  | 2.940832  | 0.508943  |  |
| B                      | 3.285618  | 2.944500  | 0.562538  |  |
| B                      | 4.901607  | 2.874855  | 0.742995  |  |
| B                      | 6.525810  | 2.893146  | 1.098445  |  |
| B                      | 8.010623  | 2.785903  | 1.607545  |  |
| B                      | -1.641117 | 2.939883  | 0.506975  |  |
| B                      | -3.273325 | 2.950084  | 0.589596  |  |
| B                      | -4.901604 | 2.896544  | 0.775436  |  |
| B                      | -6.548954 | 2.913562  | 1.044754  |  |
| B                      | -8.042070 | 2.752819  | 1.540297  |  |
| B                      | -0.003210 | -2.913853 | 0.382270  |  |
| B                      | 1.641328  | -2.941080 | 0.409485  |  |
| B                      | 3.276886  | -2.946428 | 0.531085  |  |
| B                      | 4.893496  | -2.889849 | 0.761898  |  |
| B                      | 6.499992  | -2.890324 | 1.183861  |  |
| B                      | 7.998897  | -2.781651 | 1.656991  |  |
| B                      | -1.641083 | -2.951733 | 0.339144  |  |
| B                      | -3.277777 | -2.951220 | 0.485633  |  |
| B                      | -4.900026 | -2.912621 | 0.721460  |  |
| B                      | -6.489819 | -2.910643 | 1.190661  |  |
| B                      | -8.012039 | -2.761850 | 1.608266  |  |
| B56                    |           |           |           |  |
| #Energy = +2.60 eV (K) |           |           |           |  |
| B                      | -3.198906 | 0.872858  | 0.307691  |  |
| B                      | 2.419624  | -0.779672 | 1.879181  |  |
| B                      | -2.032486 | -3.239532 | -1.144809 |  |
| B                      | 1.089824  | -2.295482 | -1.919069 |  |
| B                      | 0.408524  | -2.859542 | 1.218911  |  |
| B                      | -3.383576 | -0.714272 | 0.894181  |  |
| B                      | -1.179956 | 3.401138  | -0.949719 |  |
| B                      | -0.247576 | 2.943798  | -2.161419 |  |
| B                      | 2.324864  | -2.110402 | -0.797749 |  |
| B                      | 3.719094  | 0.303208  | 1.214011  |  |
| B                      | 1.887824  | -1.998872 | 0.836871  |  |
| B                      | -2.747836 | -1.986432 | -0.122659 |  |
| B                      | -1.543546 | 1.949658  | -1.829249 |  |
| B                      | -0.242876 | -1.880952 | -2.976769 |  |
| B                      | 1.139074  | -1.731272 | 2.294131  |  |

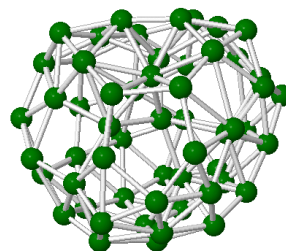

|   |           |           |           |
|---|-----------|-----------|-----------|
| B | 2.849264  | 0.754178  | 2.465091  |
| B | 2.981004  | 1.917108  | 1.224731  |
| B | -2.709536 | -1.716802 | -1.793959 |
| B | -2.253766 | 2.056878  | 1.348361  |
| B | 1.210634  | 2.237518  | -2.385599 |
| B | -0.219596 | -2.589792 | 2.748271  |
| B | -1.322456 | -3.085972 | 1.627151  |
| B | -0.262156 | -0.175312 | -3.299049 |
| B | -1.771346 | -1.037462 | -3.074269 |
| B | -3.021906 | -0.201572 | -2.418219 |
| B | -0.379946 | -2.969972 | -1.599219 |
| B | 2.910544  | 3.085238  | 0.057711  |
| B | -2.751776 | 0.534848  | 1.860741  |
| B | 1.874704  | 2.046608  | 2.573121  |
| B | -2.364086 | -3.482402 | 0.451301  |
| B | 3.101084  | -1.033132 | 0.236851  |
| B | 1.204424  | -1.069782 | -3.191519 |
| B | 2.627474  | 1.288408  | -2.252299 |
| B | -0.266226 | -1.024692 | 3.267401  |
| B | -1.417866 | 1.335978  | 2.644531  |
| B | -1.508786 | 3.343618  | 0.599011  |
| B | -0.274016 | 1.455048  | -2.901059 |
| B | -2.932706 | 1.092468  | -1.392909 |
| B | 0.812534  | -2.937622 | -0.408859 |
| B | -0.870816 | 2.835558  | 2.022761  |
| B | 1.211874  | 0.573568  | -2.800829 |
| B | 2.555894  | 2.668408  | -1.452119 |
| B | -1.661066 | -2.725952 | -2.678689 |
| B | 3.554624  | 1.637818  | -0.536089 |
| B | -2.419856 | 2.303648  | -0.421909 |
| B | -1.743426 | -1.856872 | 2.785191  |
| B | -2.866076 | -2.238272 | 1.497871  |
| B | -3.323376 | -0.517202 | -0.794519 |
| B | 0.198394  | 1.941608  | 3.140421  |
| B | 3.470594  | -0.970942 | -1.395909 |
| B | -0.414446 | 0.528468  | 3.675751  |
| B | 2.036904  | 3.310738  | 1.408261  |
| B | 2.638524  | -0.323982 | -2.710829 |
| B | -1.831456 | -0.201842 | 3.124121  |
| B | 4.188804  | 0.098158  | -0.346949 |
| B | 0.747314  | 3.239468  | 2.352641  |
